# Supplementary material for: The Relationship Between Personality Traits, Psychopathological Symptoms, and Problematic Internet Use: A Complex Mediation Model
Source: PubMed Central journal article supplement (PMC6658222; doi:10.2196/11837), 2019-04-26
Supplement: jmir_v21i4e11837_app1.pdf [file jmir_v21i4e11837_app1.pdf]

Correlations between the PIUQ and the subscales of BSI and BFI.

| Scales                           | 2    | 3    | 4    | 5    | 6    | 7    | 8    | 9    | 10   | 11   | 12    | 13    | 14    | 15    | 16    |
|----------------------------------|------|------|------|------|------|------|------|------|------|------|-------|-------|-------|-------|-------|
| 1. PIUQ-9 Total                  | .268 | .395 | .312 | .404 | .308 | .336 | .274 | .247 | .315 | .380 | -.107 | -.101 | -.366 | -.293 | -.053 |
| 2. BSI Somatization              | 1    | .628 | .596 | .682 | .778 | .623 | .687 | .654 | .689 | .833 | -.257 | -.245 | -.253 | -.289 | -.145 |
| 3. BSI Obsessive-compulsive      |      | 1    | .720 | .738 | .650 | .700 | .667 | .638 | .707 | .841 | -.343 | -.157 | -.402 | -.353 | -.143 |
| 4. BSI Interpersonal sensitivity |      |      | 1    | .762 | .700 | .679 | .699 | .705 | .707 | .844 | -.271 | -.125 | -.277 | -.375 | -.056 |
| 5. BSI Depression                |      |      |      | 1    | .763 | .680 | .700 | .707 | .802 | .897 | -.282 | -.224 | -.345 | -.377 | -.119 |
| 6. BSI Anxiety                   |      |      |      |      | 1    | .644 | .758 | .706 | .776 | .887 | -.314 | -.251 | -.274 | -.365 | -.119 |
| 7. BSI Hostility                 |      |      |      |      |      | 1    | .708 | .723 | .683 | .827 | -.225 | -.296 | -.270 | -.362 | -.045 |
| 8. BSI Phobic anxiety            |      |      |      |      |      |      | 1    | .728 | .717 | .855 | -.355 | -.269 | -.265 | -.395 | -.137 |
| 9. BSI Paranoid ideation         |      |      |      |      |      |      |      | 1    | .762 | .846 | -.301 | -.285 | -.241 | -.439 | -.033 |
| 10. BSI Psychoticism             |      |      |      |      |      |      |      |      | 1    | .886 | -.285 | -.219 | -.263 | -.355 | -.030 |
| 11. BSI Global Severity Index    |      |      |      |      |      |      |      |      |      | 1    | -.333 | -.260 | -.344 | -.428 | -.105 |
| 12. BFI Extraversion             |      |      |      |      |      |      |      |      |      |      | 1     | .465  | .418  | .474  | .425  |
| 13. BFI Agreeableness            |      |      |      |      |      |      |      |      |      |      |       | 1     | .454  | .531  | .449  |
| 14. BFI Conscientiousness        |      |      |      |      |      |      |      |      |      |      |       |       | 1     | .493  | .475  |
| 15. BFI Emotional Stability      |      |      |      |      |      |      |      |      |      |      |       |       |       | 1     | .220  |
| 16. BFI Intellect/Openness       |      |      |      |      |      |      |      |      |      |      |       |       |       |       | 1     |

Note. PIUQ-9 Total: Sum score of the Problematic Internet Use Questionnaire. BSI: Brief Symptom Inventory. BFI: Big Five Inventory.

Correlations above | .219 | are significant at  $P < .001$ .
